# Supplementary material for: Chemoproteomic profiling reveals cellular targets of nitro-fatty acids
Source: PubMed Central journal article supplement — Redox Biol. 2021 Sep 7;46:102126. doi: 10.1016/j.redox.2021.102126 (PMC8441202; doi:10.1016/j.redox.2021.102126), 2021-09-07
Supplement: mmc2.pdf [file mmc2.pdf]

## Supplementary Information

### Chemoproteomic profiling reveals cellular targets of nitro-fatty acids

Ming-Yu Fang<sup>a,g</sup>, Kuan-Hsun Huang<sup>b,g</sup>, Wei-Ju Tu<sup>c</sup>, Yi-Ting Chen<sup>c,d,e</sup>, Pei-Yun Pan<sup>b</sup>, Wan-Chi Hsiao<sup>a,f</sup>, Yi-Yu Ke<sup>b</sup>, Lun K. Tsou<sup>b</sup>, Mingzi M. Zhang<sup>a\*</sup>

<sup>a</sup>Institute of Molecular and Genomic Medicine, National Health Research Institutes, Zhunan, Miaoli, 35053, Taiwan

<sup>b</sup>Institute of Biotechnology and Pharmaceutical Research, National Health Research Institutes, Zhunan, Miaoli, 35053, Taiwan

<sup>c</sup>Graduate Institute of Biomedical Sciences, College of Medicine, Chang Gung University, Taoyuan, Taiwan

<sup>d</sup>Department of Biomedical Sciences, College of Medicine, Chang Gung University, Taoyuan, Taiwan

<sup>e</sup>Department of Nephrology, Chang Gung Memorial Hospital, Linkou Medical Center, Taoyuan, Taiwan

<sup>f</sup>Institute of Biotechnology, National Tsing Hua University, Hsinchu, 30013, Taiwan

<sup>g</sup>Equal contribution

\*To whom correspondence may be addressed:

zhangmz@nhri.edu.tw, 35 Keyan Road, Zhunan, Miaoli, 35053, Taiwan

**Supplementary Figures** Page S2-S10

**Supplementary Tables Legends** Page S11

**Supplementary Materials and Methods** Page S12-S18

**Supplementary References** Page S19-S20

## Supplementary Figures

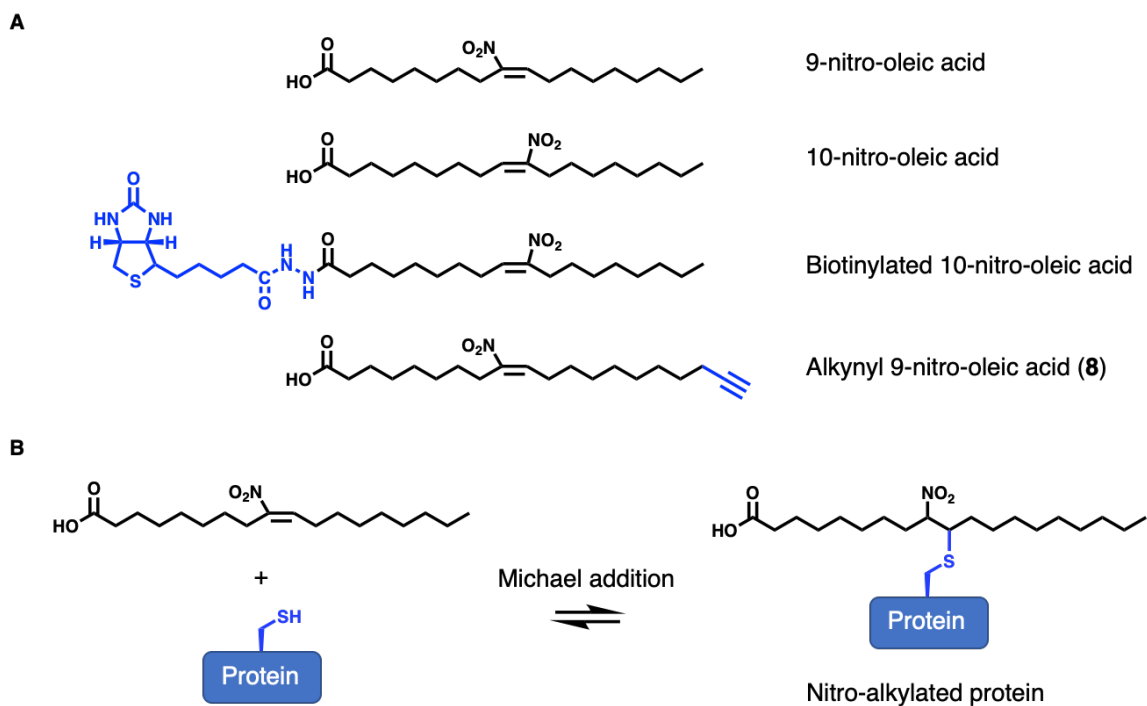

**Supplementary Figure 1. Protein nitro-alkylation is a reversible protein modification. (A)** Chemical structures of selected positional isomers of nitro-oleic acids, 9-nitro-oleate and 10-nitro-oleate. Also shown are the chemical structures of nitro-oleate probes for the detection of nitro-alkylated proteins, including the widely used biotinylated nitro-oleate [1], and the alkynyl-9-nitro-oleate probe **8** from this study. **(B)** Nitro-fatty acids form reversible protein adducts with the thiols of cysteine residues of target proteins via Michael addition.

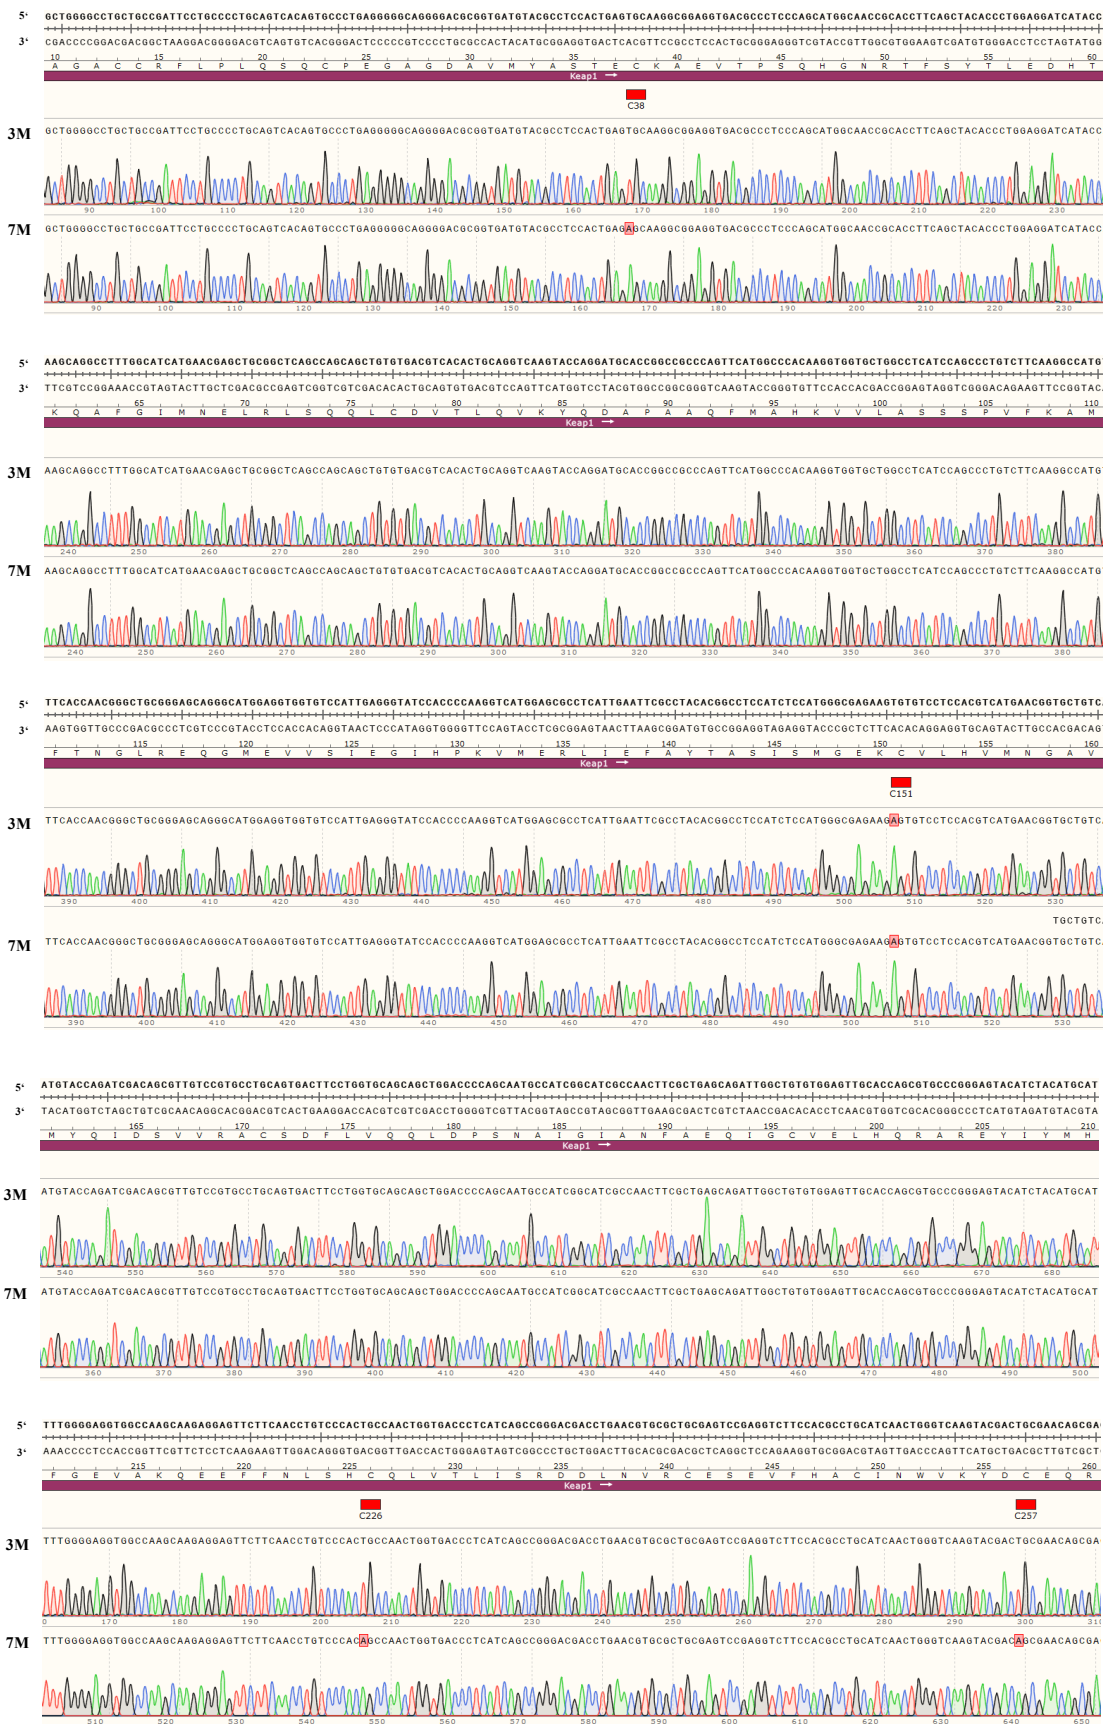

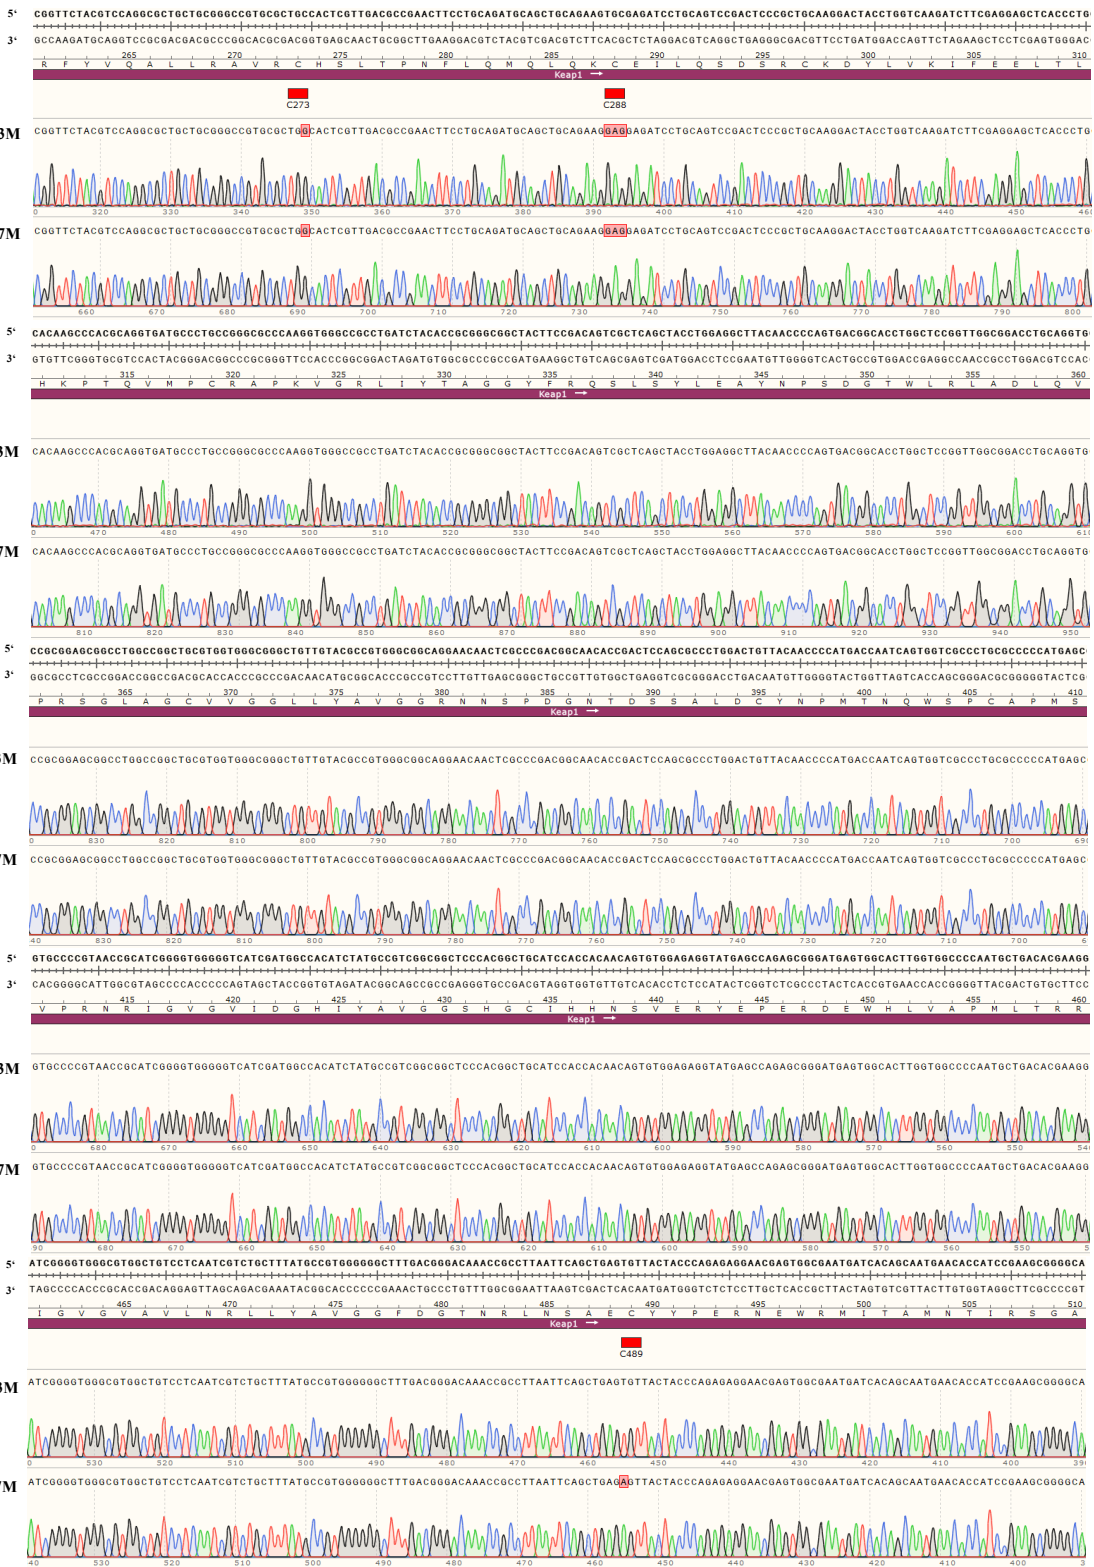

**Supplementary Figure 2. Sanger sequencing traces confirming the presence of indicated mutations in 3M and 7M KEAP1 mutants. 3M: C151S, C273W, C288E. 7M: C38S, C151S, C226S, C257S, C273W, C288E, C489S.**

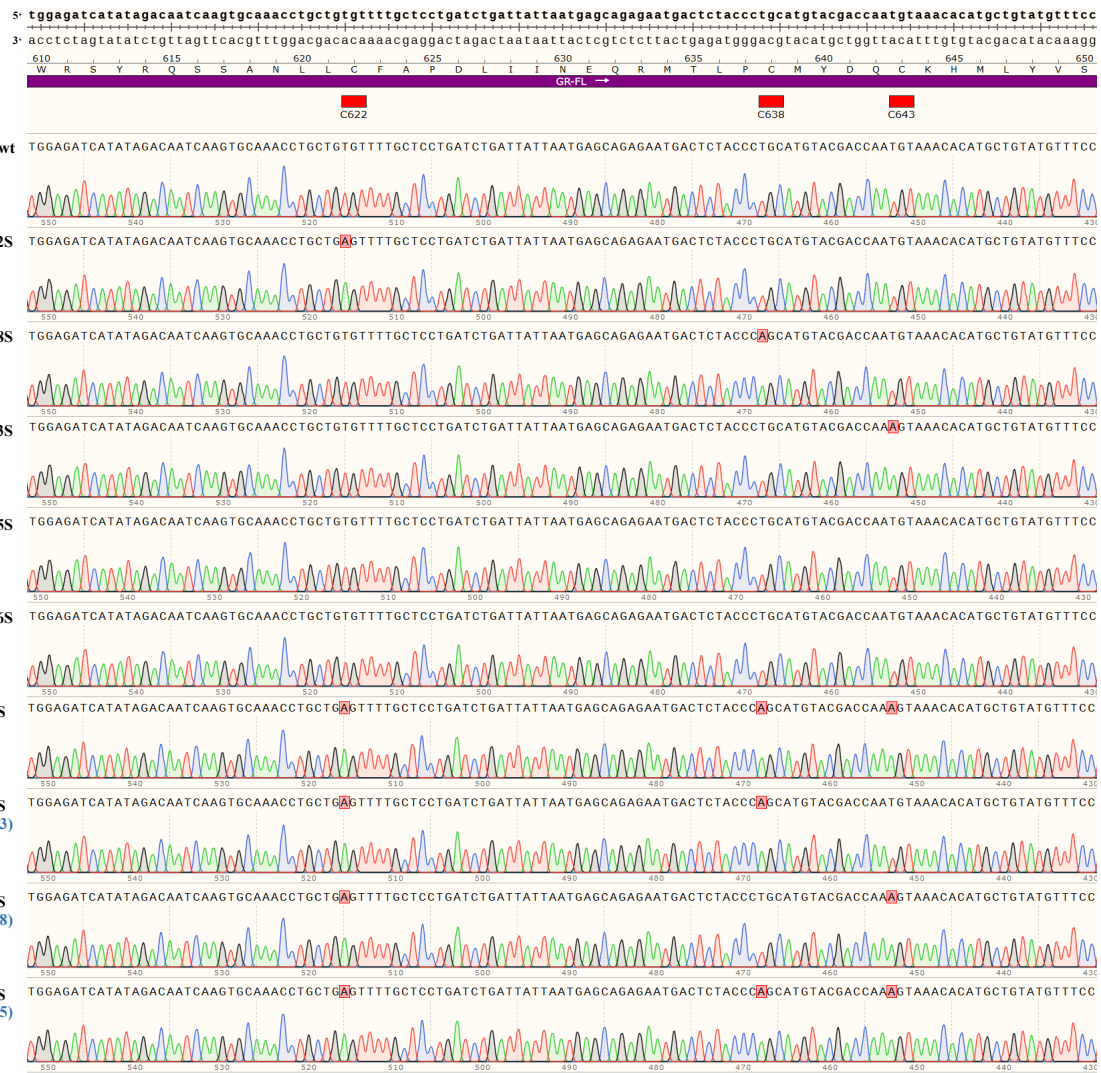



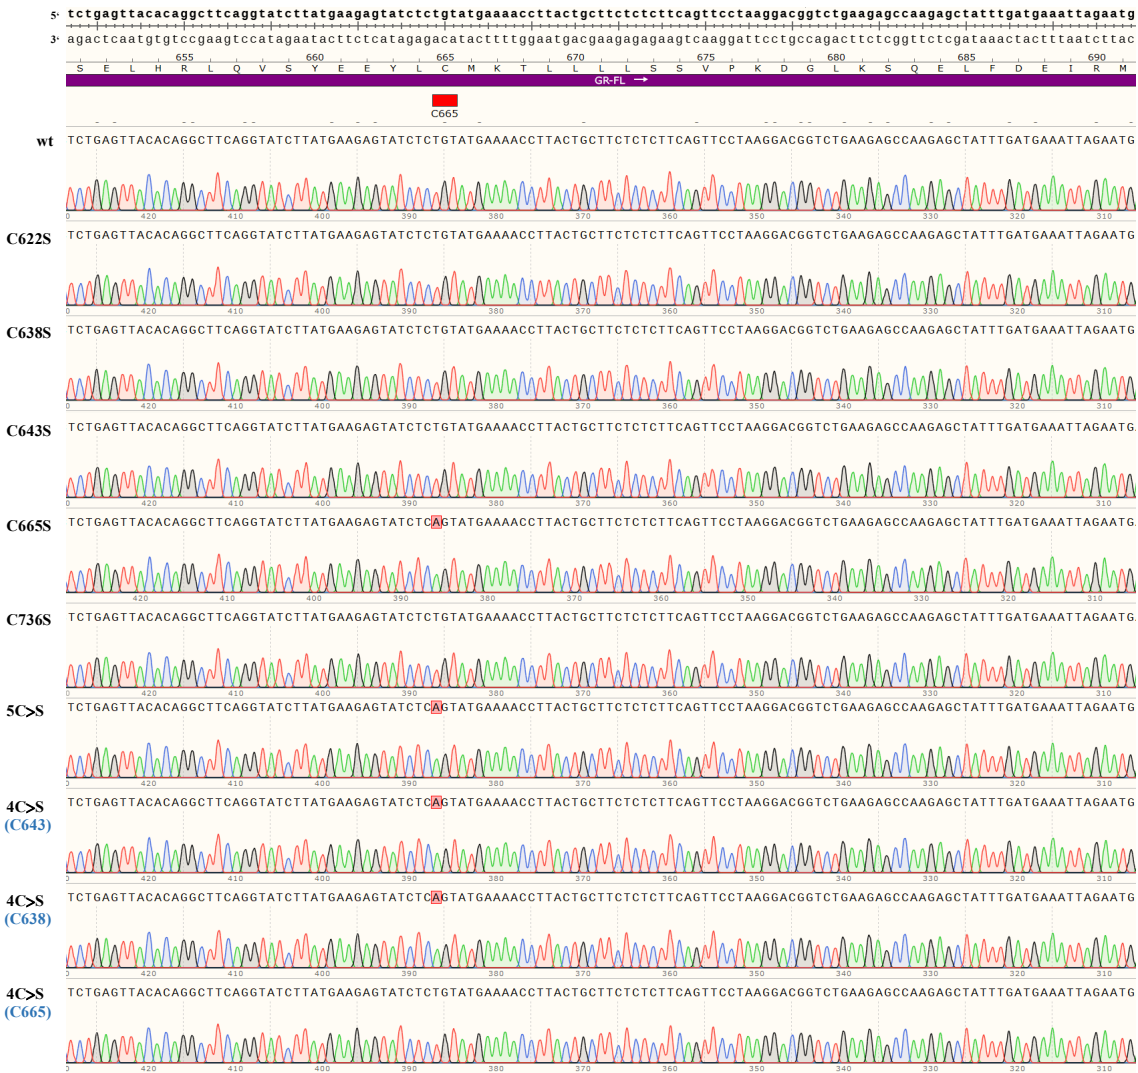

5' acctacatcaaagagctaggaaaagccattgtcaagaggggaaggaactccagccagaactggcagcgggtttatcaactgacaaaactcttggattctatgcatgaagtggttgaaaatctc  
 3' tggatgtagtttctcgatccttttcggtaacagttctcccttcccttgaggtcggctctgaccgctcgccaaaatagttgactgttttgagaacctaaagatcgtaacctcaccacacttttagag  
 T Y I K E L G K A I V K R E G N S S Q N W Q R F Y Q L T K L L D S M H E V V E N L  
 GR-FL →

wt ACCTACATCAAAGAGCTAGGAAAAGCCATTGTCAAGAGGGAAGGAACTCCAGCCAGAACTGGCAGCGGTTTTATCAACTGACAAAACCTTTGGATTCTATGCATGAAGTGGTTGAAAATCTC

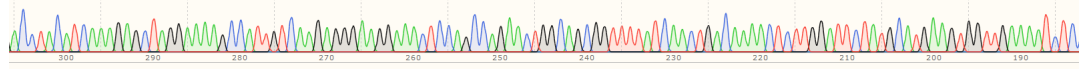

C622S ACCTACATCAAAGAGCTAGGAAAAGCCATTGTCAAGAGGGAAGGAACTCCAGCCAGAACTGGCAGCGGTTTTATCAACTGACAAAACCTTTGGATTCTATGCATGAAGTGGTTGAAAATCTC

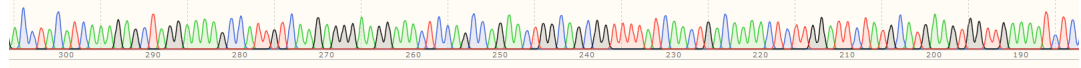

C638S ACCTACATCAAAGAGCTAGGAAAAGCCATTGTCAAGAGGGAAGGAACTCCAGCCAGAACTGGCAGCGGTTTTATCAACTGACAAAACCTTTGGATTCTATGCATGAAGTGGTTGAAAATCTC

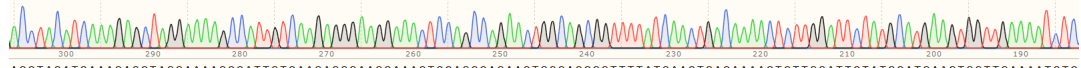

C643S ACCTACATCAAAGAGCTAGGAAAAGCCATTGTCAAGAGGGAAGGAACTCCAGCCAGAACTGGCAGCGGTTTTATCAACTGACAAAACCTTTGGATTCTATGCATGAAGTGGTTGAAAATCTC

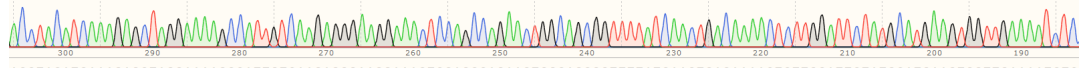

C665S ACCTACATCAAAGAGCTAGGAAAAGCCATTGTCAAGAGGGAAGGAACTCCAGCCAGAACTGGCAGCGGTTTTATCAACTGACAAAACCTTTGGATTCTATGCATGAAGTGGTTGAAAATCTC

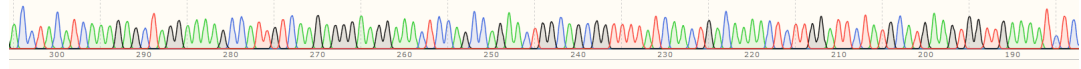

C736S ACCTACATCAAAGAGCTAGGAAAAGCCATTGTCAAGAGGGAAGGAACTCCAGCCAGAACTGGCAGCGGTTTTATCAACTGACAAAACCTTTGGATTCTATGCATGAAGTGGTTGAAAATCTC

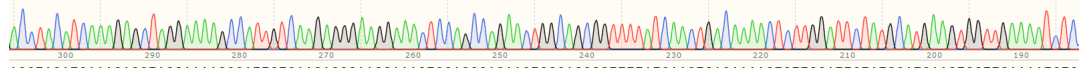

5C>S ACCTACATCAAAGAGCTAGGAAAAGCCATTGTCAAGAGGGAAGGAACTCCAGCCAGAACTGGCAGCGGTTTTATCAACTGACAAAACCTTTGGATTCTATGCATGAAGTGGTTGAAAATCTC

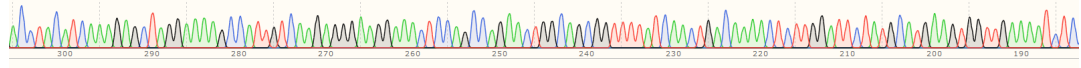

4C>S (C643) ACCTACATCAAAGAGCTAGGAAAAGCCATTGTCAAGAGGGAAGGAACTCCAGCCAGAACTGGCAGCGGTTTTATCAACTGACAAAACCTTTGGATTCTATGCATGAAGTGGTTGAAAATCTC

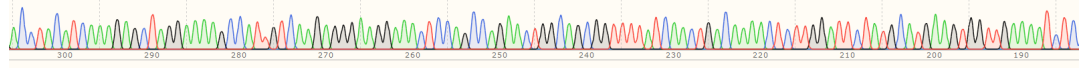

4C>S (C638) ACCTACATCAAAGAGCTAGGAAAAGCCATTGTCAAGAGGGAAGGAACTCCAGCCAGAACTGGCAGCGGTTTTATCAACTGACAAAACCTTTGGATTCTATGCATGAAGTGGTTGAAAATCTC

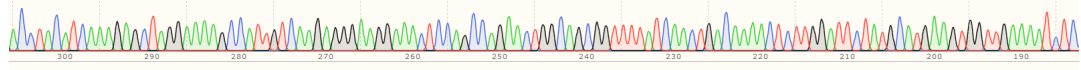

4C>S (C665) ACCTACATCAAAGAGCTAGGAAAAGCCATTGTCAAGAGGGAAGGAACTCCAGCCAGAACTGGCAGCGGTTTTATCAACTGACAAAACCTTTGGATTCTATGCATGAAGTGGTTGAAAATCTC

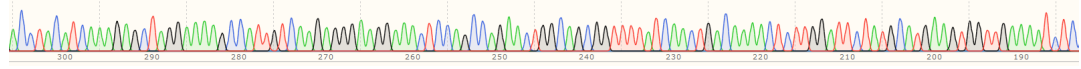

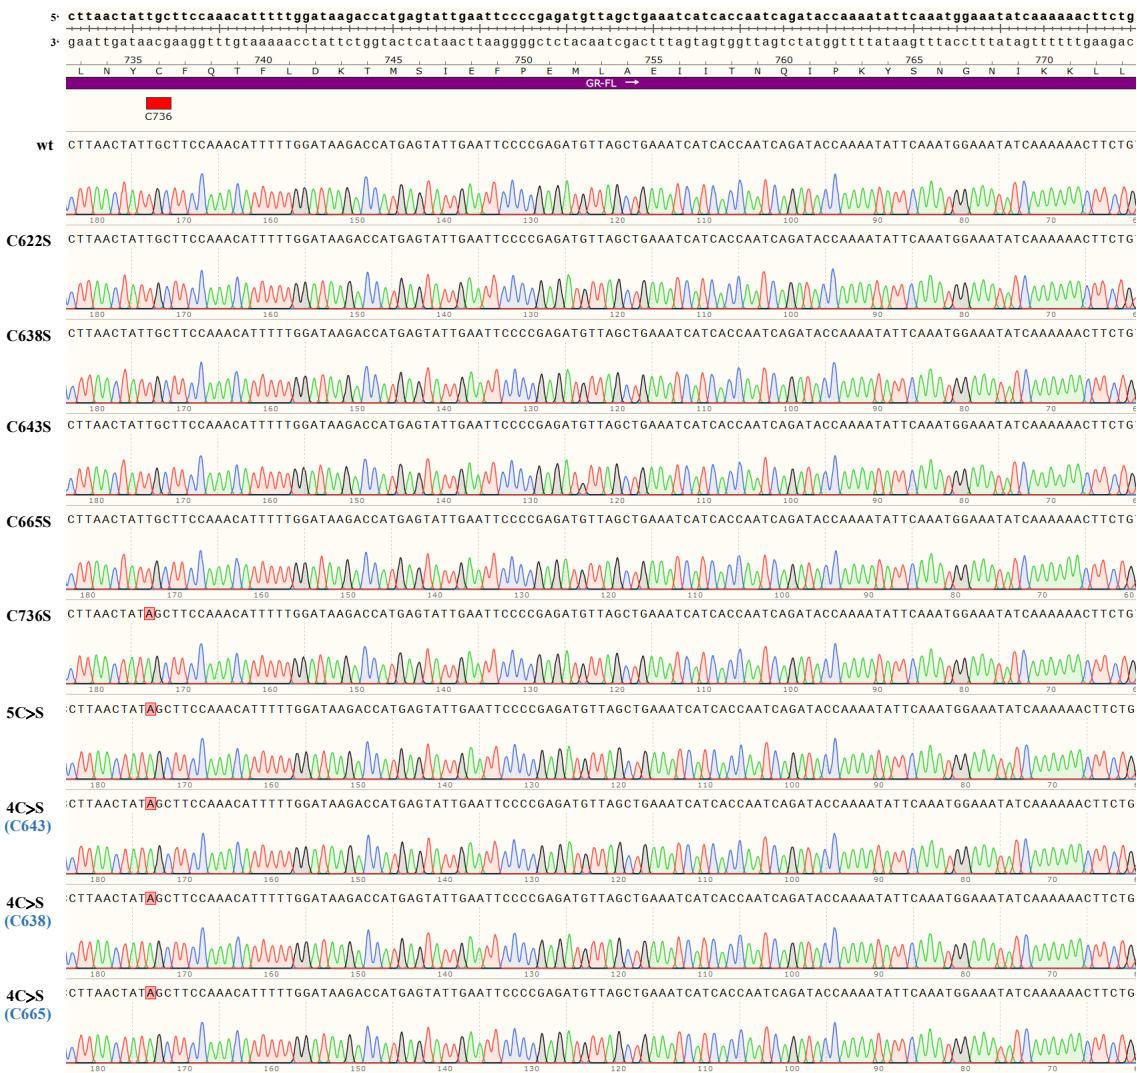

**Supplementary Figure 3. Sanger sequencing traces confirming the presence of indicated cysteine to serine mutations in NR3C1-LBD. 5C>S refers to the mutant with all 5 cysteines (C622, C638, C643, C665, C736) in the LBD mutated to serine. 4C>S (Cxxx) refers to mutants with 4 of the 5 cysteines in the LBD mutated to serine, with the indicated cysteine remaining intact.**



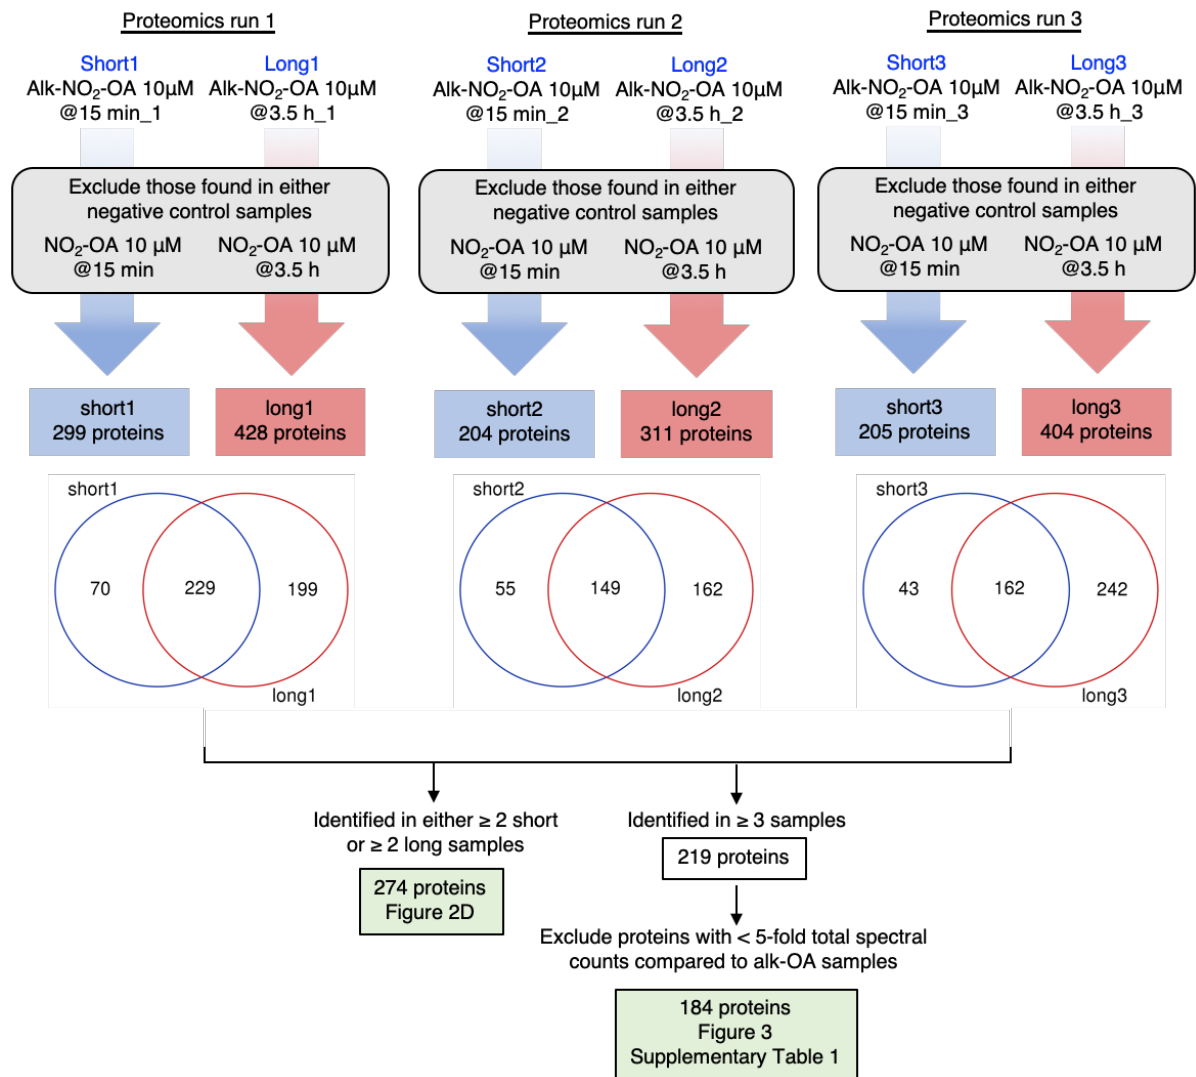

**Supplementary Figure 4. Filter criteria for the identification of nitro-alkylated proteins from THP1 cells.** Each proteomics run is an independent biological repeat. For each proteomics run, from the list of proteins obtained in the alk-9-NO<sub>2</sub>-OA samples that were treated for 15 min (short) and 3.5 h (long), we excluded proteins that were also identified in either of the two negative control samples (9-NO<sub>2</sub>-OA). Filtering for proteins that were either identified in  $\geq 2$  short or  $\geq 2$  long samples yielded 274 proteins as represented in Figure 2D. Filtering for proteins that were identified  $\geq 3$  times in the total of 6 samples yielded and excluding proteins that were similarly enriched using alk-OA yielded 184 proteins. These proteins were used for bioinformatics analyses represented in Figure 3 and listed in Supplementary Table 1.

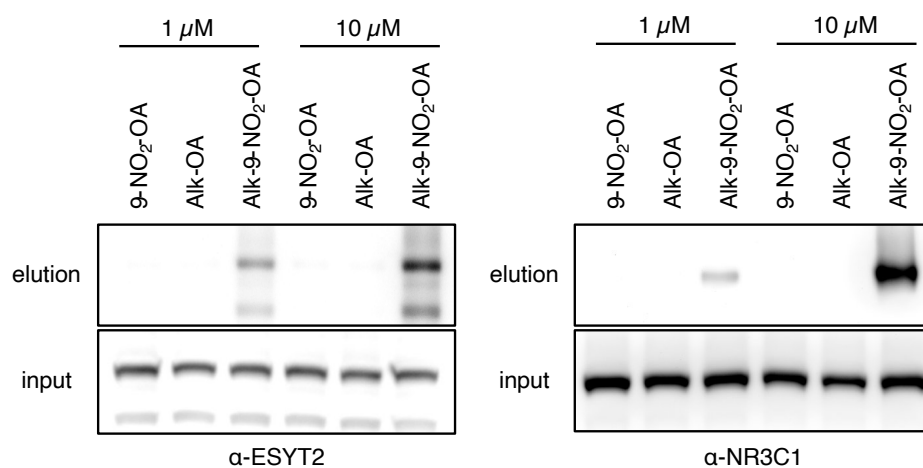

**Supplementary Figure 5. Selective enrichment of selected nitro-alkylated proteins at lower probe concentrations.** Lysates from THP1 macrophages treated with the lipids at the indicated concentrations for 15 min were reacted with biotin-azide via CuAAC. Protein samples before NeutrAvidin enrichment (input) and after elution were immunoblotted for the ESYT2 and NR3C1.

## Supplementary Tables Legends

**Supplementary Table 1. High-confidence list of nitro-alkylated proteins from THP1 macrophages identified by chemoproteomics study.** Proteins are ranked by the total number of peptide spectrum matches (PSMs) identified in alk-9-NO<sub>2</sub>-OA samples. (.xlsx)

**Supplementary Table 2. Comparative analysis of high confidence nitro-alkylated protein list from this study with protein targets of other indicated electrophilic compounds.** Proteins found to be modified by the indicated electrophiles in their respective studies are highlighted in green. IA, iodoacetamide [2]. DMF, dimethyl fumarate [3]. HNE, 4-hydroxy-2-nonenal and ONE, 4-oxo-2-nonenal [4,5]. Sulforaphane [6]. BMK, bromomethyl ketone [7]. Curcumin [8,9]. HD, 2-trans-hexadecenal [10]. CDDO-Im, imidazole derivative of 2-cyano-3,12-dioxooleana-1,9(11)-dien-28-oic acid [11]. 2BP, 2-bromopalmitate [12,13]. (.xlsx)

## Supplementary Materials and Methods

### Chemical synthesis of clickable alk-9-NO<sub>2</sub>-OA probe.

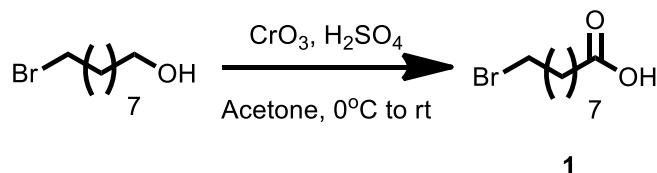

**9-bromononanoic acid 1:** To the solution of 2.5 M Jones' reagent (30 mL, 76.18 mmol, 1.7 eq.) in 10 mL of acetone was added 9-bromononanol (10 g, 44.81 mmol) in acetone (10 mL) at 0 °C. After reaction was completed, the solution mixture was added water (100 mL) and Et<sub>2</sub>O (100 mL). After phase separation, the aqueous layer was extracted with Et<sub>2</sub>O (50 mL x 3). The combined organic layer was washed with 1.0 N NaOH (30 mL x 3). The aqueous layers were combined and washed with DCM (30 mL x 2) to remove nonpolar impurities. The aqueous layer was acidified to pH 2 with conc. HCl and extracted with Et<sub>2</sub>O (30 mL x 3). The combined organic layers were washed with brine (50 mL x 2), dried over MgSO<sub>4</sub>, filtered, and concentrated in vacuo to provide 9-bromononanoic acid **1** (6.68 g, 63%). <sup>1</sup>H NMR (CDCl<sub>3</sub>, 400 MHz): δ 3.38 (2H, t, *J* = 9.2 Hz), 2.33 (2H, *J* = 10 Hz), 1.88-1.78 (2H, m), 1.64-1.57 (2H, m), 1.42-1.40 (2H, m), 1.38-1.30 (6H, m); <sup>13</sup>C NMR (CDCl<sub>3</sub>, 176 MHz): δ 180.51, 34.20, 34.04, 32.88, 29.14, 29.02, 28.65, 28.19, 24.71 [14].

Jone's reagent preparation: Dissolve CrO<sub>3</sub> (25 g, 0.25 mol) in H<sub>2</sub>O (75 mL) then was added conc. H<sub>2</sub>SO<sub>4</sub> (25 mL) slowly at 0 °C. The concentration of the solution prepared by this procedure is 2.5 M.

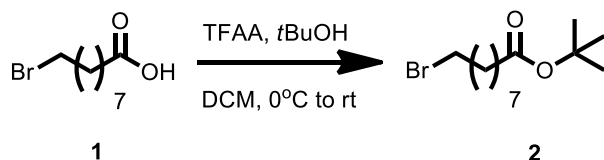

**Ester 2:** To a solution of 9-bromononanoic acid **1** (208 mg, 0.88 mmol) in DCM (4.4 mL) was added dropwise TFAA (405 mg, 1.93 mmol, 2.2 eq.) at 0 °C. The resulting mixture was stirred for 2.5 h before addition *t*BuOH (228 mg, 3.07 mmol, 3.5 eq.) at 0 °C. The resulting mixture was slowly warmed to RT. After reaction was completed, resulting mixture was added 10 mL of NaHCO<sub>3</sub> (sat. aq) and extracted with Et<sub>2</sub>O (10 mL x 3). The combined organic layers were washed with brine, dried over MgSO<sub>4</sub>, filtered, and concentrated in vacuo to give ester **2** (238 mg, 93%). <sup>1</sup>H NMR (400 MHz, CDCl<sub>3</sub>): δ 3.38 (2H, t, *J* = 7.2 Hz), 2.18 (2H, s, *J* = 7.6 Hz), 1.86-1.79 (2H, m), 1.59-1.52 (overlap with water residual, 2H, m), 1.43-1.38 (11H, m), 1.29 (6H, br); <sup>13</sup>C NMR (176 MHz, CDCl<sub>3</sub>): δ 173.20, 79.91, 35.59, 33.93, 32.85, 29.16, 29.02, 28.65, 28.19, 28.17, 25.09 [15].

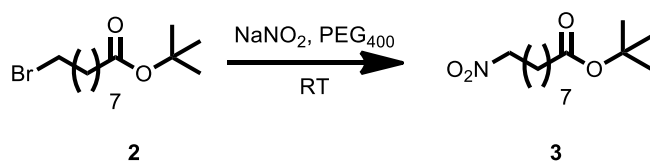

**tert-butyl 9-nitrononanoate 3:** To the flask was added NaNO<sub>2</sub> (424 mg, 6.15 mmol, 3.0 eq.) and PEG-400 (4.0 mL). The resulting mixture was stirred for 3 h at RT before addition ester **2**

(600 mg, 2.05 mmol). After the reaction was completed, resulting mixture was added 40 mL of water and extracted with Et<sub>2</sub>O (20 mL x 3). The combined organic layers were washed with brine, dried over MgSO<sub>4</sub>, filtered, and concentrated in vacuo. The residue was purified by flash chromatography (10% EtOAc/hexane, R<sub>f</sub>=0.33) to yield the *tert*-butyl 9-nitrononanoate **3** (234 mg, 44%). <sup>1</sup>H NMR (400 MHz, CDCl<sub>3</sub>): δ 4.351 (2H, t, *J* = 7.2 Hz), 2.18 (2H, t, *J* = 7.6), 1.99-1.94 (2H, m), 1.58-1.52 (2H, m), 1.42 (9H, s), 1.37-1.29 (8H, m); <sup>13</sup>C NMR (176 MHz, CDCl<sub>3</sub>): δ 172.96, 79.72, 75.47, 35.28, 28.73, 28.66, 28.49, 27.90, 27.16, 25.96, 24.77; HRMS (ESI): calculated for C<sub>13</sub>H<sub>25</sub>NNaO<sub>4</sub> [M+Na<sup>+</sup>] 282.1676, found 282.1690.

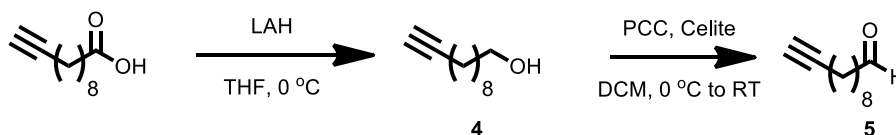

To a solution of LAH (603 mg, 15.09 mmol) in THF (40 mL) was added dropwise undec-10-ynoic acid (1338 mg, 7.95 mmol) in THF (10 mL) at 0 °C. After the reaction was completed, resulting mixture was added 10 mL of water at 0 °C and then adjusted to pH 3-5 using conc. HCl. The aqueous layer was extracted with Et<sub>2</sub>O (100 mL x 3). The combined organic layers were washed with brine, dried over MgSO<sub>4</sub>, filtered, and concentrated in vacuo to give crude alcohol **4**. The crude alcohol **4** was used for next reaction without further purification. <sup>1</sup>H NMR (400 MHz, CDCl<sub>3</sub>): δ 3.64 (t, *J* = 6.6 Hz, 2H), 3.49 (s, 1H), 2.18 (dt, *J* = 7.1, 2.6 Hz, 2H), 1.94 (t, *J* = 2.7 Hz, 1H), 1.63 – 1.47 (m, 4H), 1.46 – 1.21 (m, 10H); <sup>13</sup>C NMR (100 MHz, CDCl<sub>3</sub>): δ 84.92, 68.20, 63.20, 32.91, 29.57, 29.49, 29.16, 28.85, 28.60, 25.84, 18.53.

Alcohol **4** was dissolved in DCM (40 mL) followed by addition of PCC (2.23 g, 10.34 mmol) and celite (2.6 g) at 0 °C. After the reaction was completed, resulting mixture was filtered by celite and concentrated in vacuo. The residue was purified by flash chromatography (10%, EtOAc/hexane, R<sub>f</sub>=0.53) to yield the aldehyde **5** (759 mg, 57% in two steps).[16] <sup>1</sup>H NMR (400 MHz, CDCl<sub>3</sub>): δ 9.74 (1H, t, *J* = 1.6 Hz), 2.40 (2H, td, *J* = 7.36, 1.84 Hz), 2.16 (2H, td, *J* = 7.0, 2.64 Hz), 1.92 (1H, t, *J* = 2.64 Hz), 1.64-1.59 (3H, m), 1.53-1.46 (2H, m), 1.40-1.35 (2H, m), 1.33-1.26 (5H, m); <sup>13</sup>C NMR (100 MHz, CDCl<sub>3</sub>): δ 203.163, 84.901, 68.324, 44.092, 29.407, 29.285, 29.071, 28.842, 28.621, 22.247, 18.579 [16].

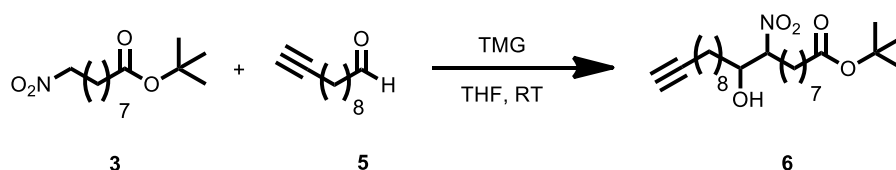

**β-Hydroxynitro ester 6:** To a solution of *tert*-butyl 9-nitrononanoate **3** (299 mg, 1.15 mmol) and aldehyde **5** (211 mg, 1.27 mmol, 1.1 eq.) in THF (6.0 mL) was added TMG (27 mg, 0.23 mmol, 0.2 eq.) dropwise at RT. After the reaction was completed, solvent was removed by reducing pressure and the residue was purified by flash chromatography (10% EtOAc/hexane, R<sub>f</sub>=0.08) to yield the 45:55 mixture of diastereomers β-hydroxynitro ester **6** (332 mg, 68%). The mixture was used for next reaction without further purification.



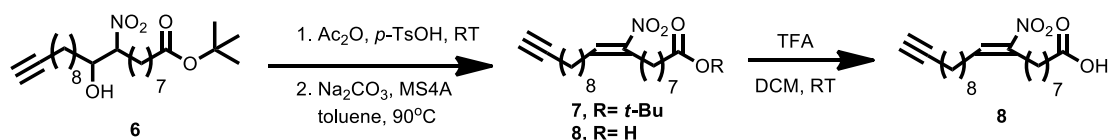

**((E)-9-nitricos-9-en-19-ynoic acid 8:** The  $\beta$ -hydroxynitro ester **6** (205 mg, 0.48 mmol) in round bottom flask was added acetic anhydride (3.0 mL) as solvent and a catalytic amount of *p*-toluenesulfonic acid (10 mg). The solution was stirred under  $\text{N}_2$  at RT for overnight. After reaction was completed, the solvent was removed by azeotropic removal with toluene ( $3 \times 20$  mL) under reduced pressure. The residual was dissolved in toluene (3 mL) and addition of  $\text{Na}_2\text{CO}_3$  (51 mg, 0.482 mmol, 1.0 eq.). The solution was heated to  $90^\circ\text{C}$  under  $\text{N}_2$  for overnight. After the reaction was completed, the solution is cooled to RT and diluted with 10 mL of  $\text{NH}_4\text{Cl}$  (sat. aq) and 10 mL  $\text{Et}_2\text{O}$ . After phase separation, the aqueous layer is extracted with  $\text{Et}_2\text{O}$  (10 mL  $\times$  3). The combined organic layers were washed with brine, dried over  $\text{MgSO}_4$ , filtered, and concentrated in vacuo to afford nitroalkene products **7** and **8** as a mixture. The mixture was used for next reaction without further purification.

To the above mixture in DCM (3.0 mL) was added TFA (1.0 mL) at RT. After the reaction was completed, the solvent and excess TFA were removed by reducing pressure. The residual was purified by flash chromatography (20% EtOAc/hexane,  $R_f=0.42$ ) to yield the (*E*)-9-nitricos-9-en-19-ynoic acid **8** (69 mg, 41% in three steps).  $^1\text{H}$  NMR (400 MHz,  $\text{CDCl}_3$ ):  $\delta$  7.08 (1H, t,  $J=7.6$  Hz), 2.56 (2H, appear t), 2.35 (2H, t,  $J=7.48$ ), 2.24-2.16 (4H, m), 1.94 (1H, t,  $J=2.64$ ), 1.65-1.61 (3H, m), 1.54-1.44 (8H, m), 1.41-1.25 (11H, m);  $^{13}\text{C}$  NMR (100 MHz,  $\text{CDCl}_3$ ):  $\delta$  180.0, 151.7, 136.4, 84.6, 68.1, 33.9, 29.2, 29.1, 28.9, 28.84, 28.80, 28.6, 28.4, 28.3, 27.9, 27.8, 26.2, 24.5; HRMS (ESI): calculated for  $\text{C}_{20}\text{H}_{32}\text{NO}_4$  [ $\text{M}-\text{H}^+$ ] 350.2337, found 350.2321.

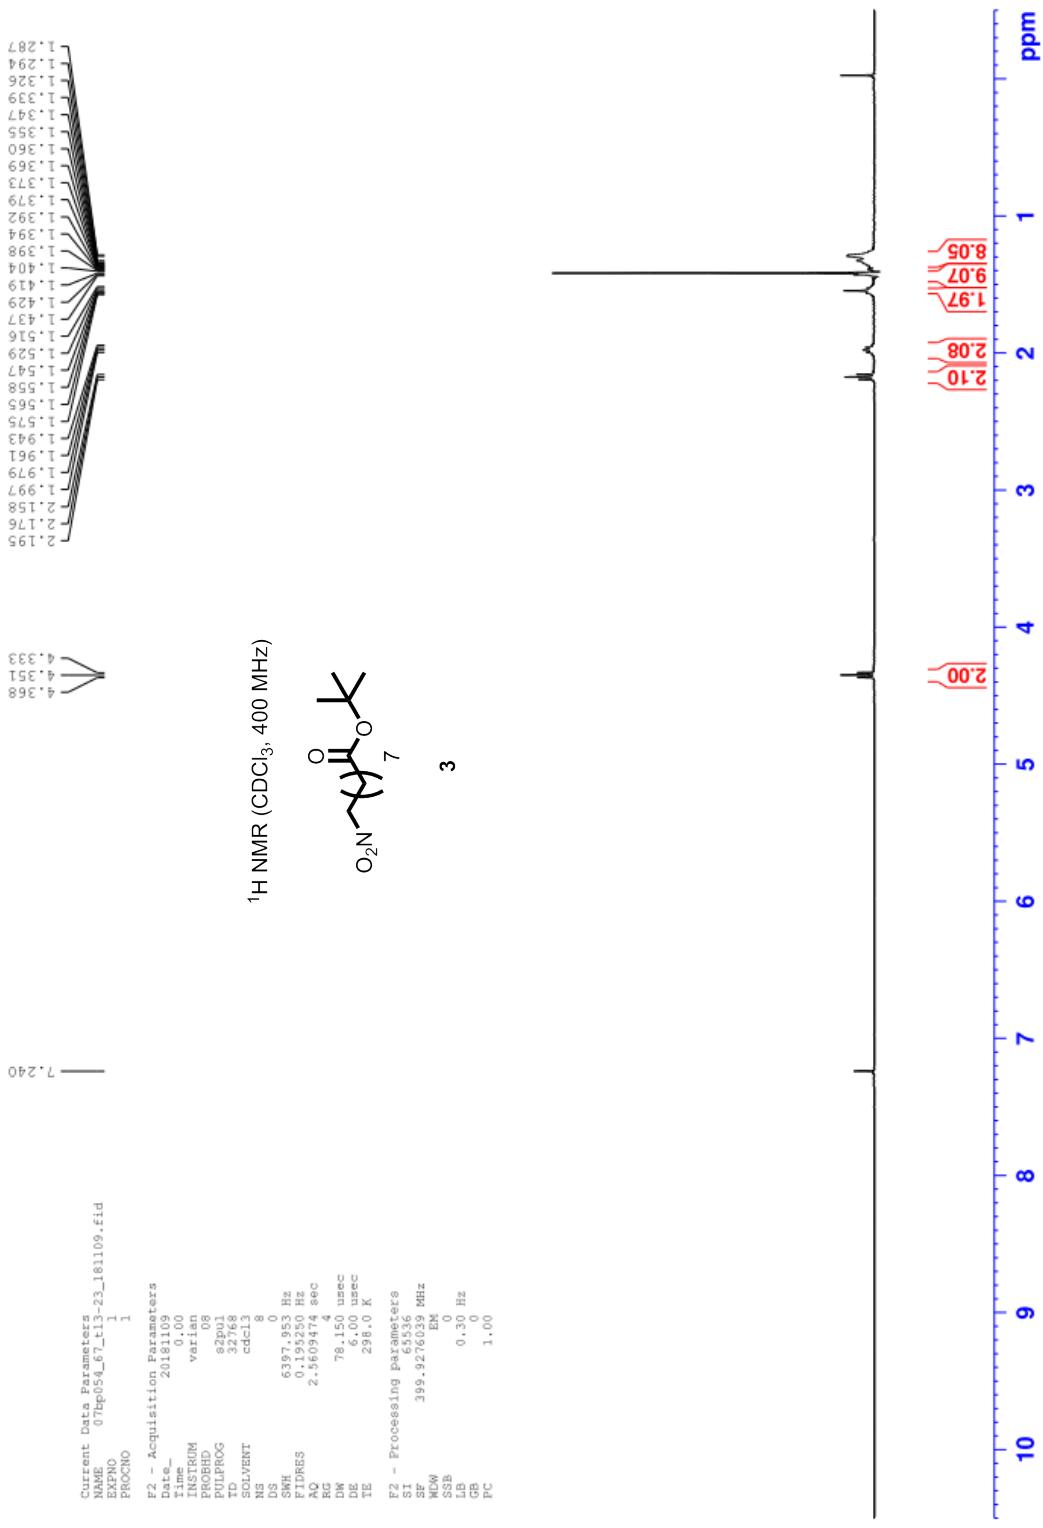

Current Data Parameters  
 NAME NHR1-07BP-054-68-C.fid  
 EXPNO 1  
 PROCNO 1  
 F2 - Acquisition Parameters  
 Date\_ 20200916  
 Time 0:00  
 INSTRUM varisc  
 PROBDI s20nl  
 PULPROG zgpg30  
 TD 131072  
 SOLVENT cdcl3  
 NS 144  
 DS 0  
 SMH 44642.855 Hz  
 FIDRES 0.340598 Hz  
 AQC 1.4680676 sec  
 RG 4  
 DW 11.200 usec  
 DE 6.00 usec  
 TE 298.0 K  
 F2 - Processing Parameters  
 SI 32768  
 SF 175.9532364 MHz  
 EQ 2  
 MWDW EM  
 SSB 0  
 LB 0.30 Hz  
 GB 0  
 PC 1.00

79.72  
77.18  
77.00  
76.82  
75.49  
35.28  
28.73  
28.66  
28.46  
27.90  
27.16  
25.96  
24.77

<sup>13</sup>C NMR (CDCl<sub>3</sub>, 176 MHz)

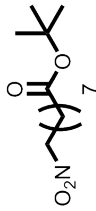

3

210 200 190 180 170 160 150 140 130 120 110 100 90 80 70 60 50 40 30 20 ppm

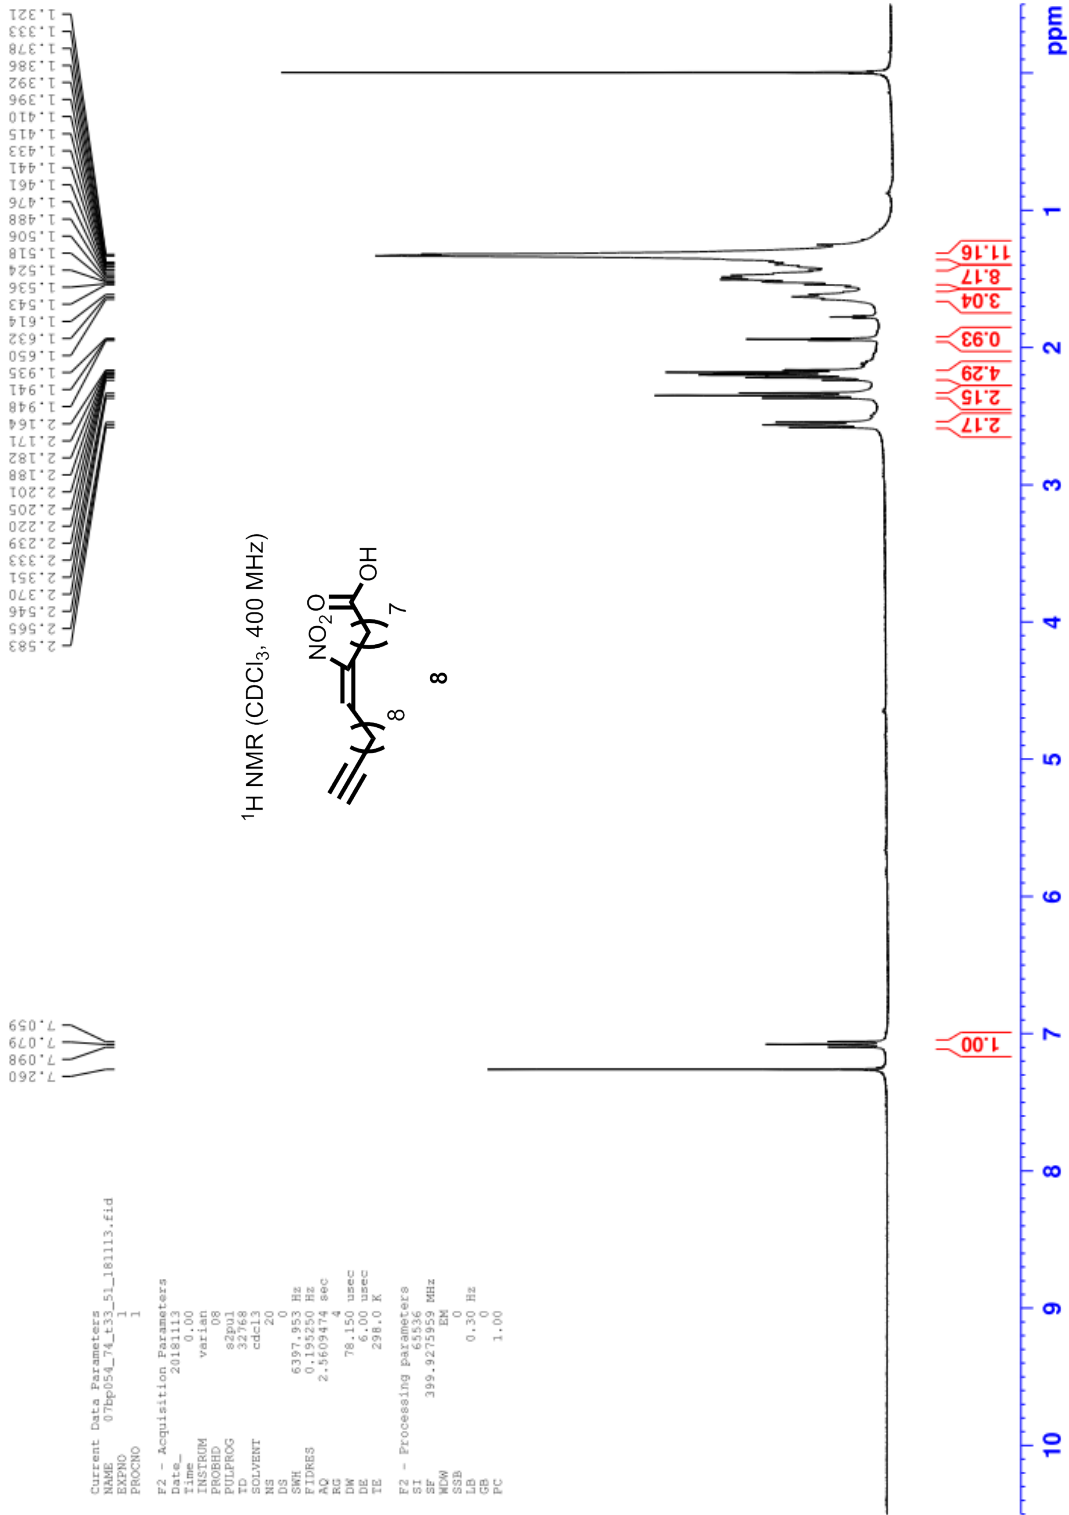

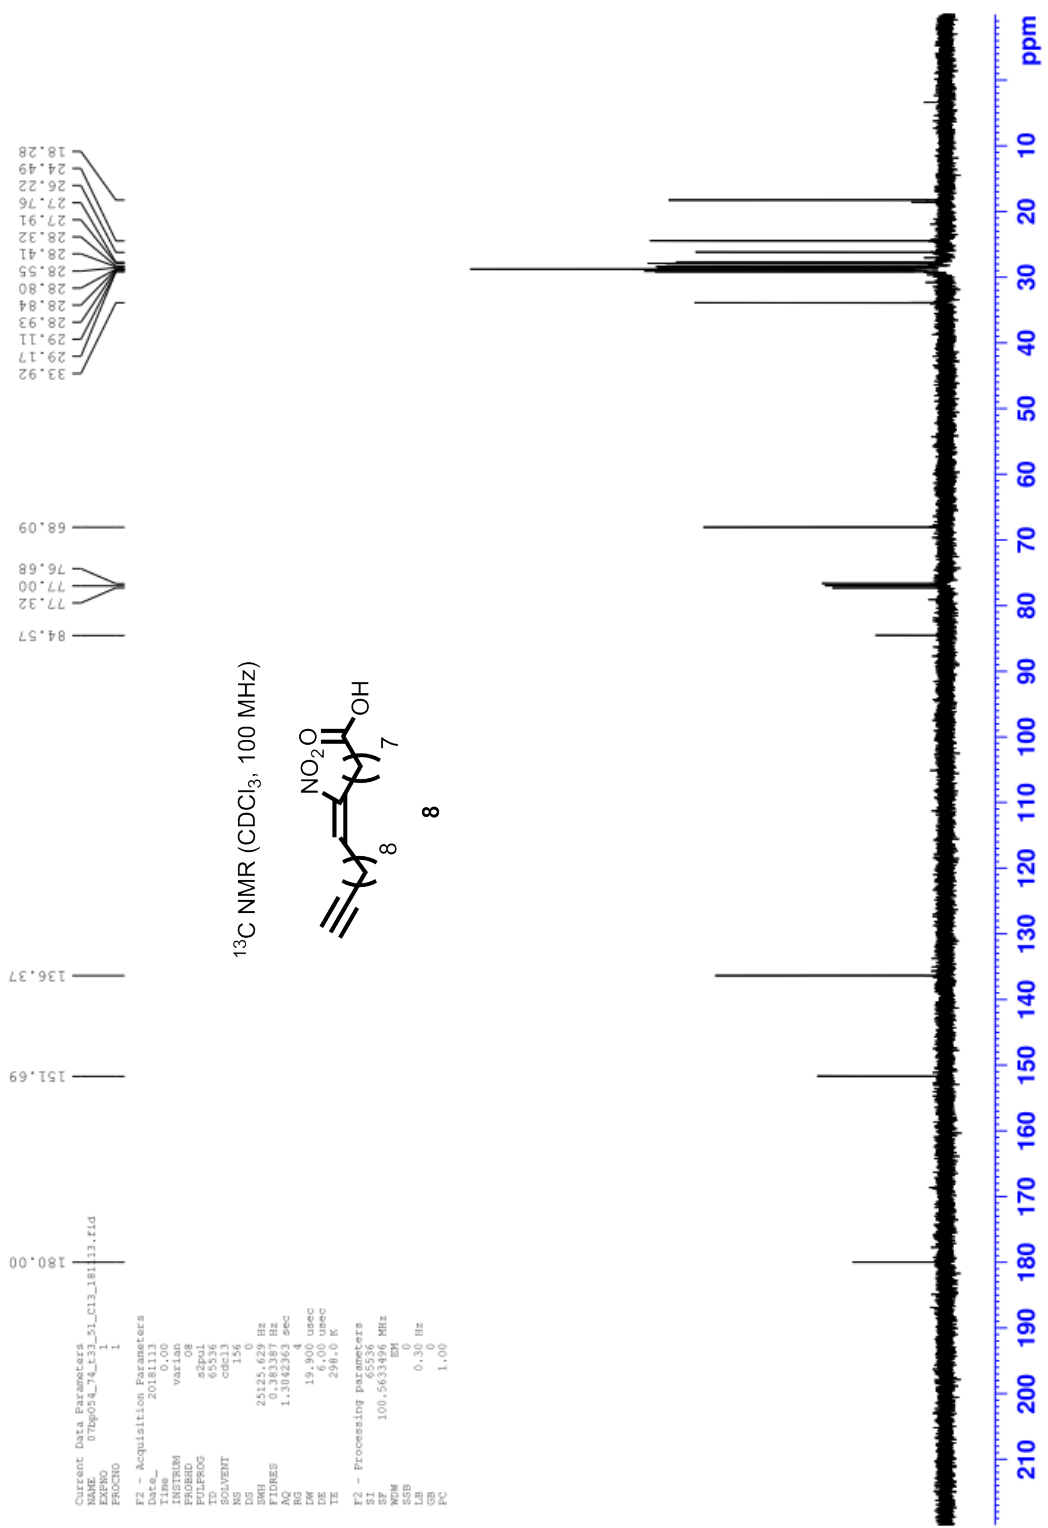



## References

- [1] T. Cui, F.J. Schopfer, J. Zhang, K. Chen, T. Ichikawa, P.R.S. Baker, C. Batthyany, B.K. Chacko, X. Feng, R.P. Patel, A. Agarwal, B.A. Freeman, Y.E. Chen, Nitrated Fatty Acids: Endogenous Anti-inflammatory Signaling Mediators, *J. Biol. Chem.* 281 (2006) 35686–35698. <https://doi.org/10.1074/jbc.M603357200>.
- [2] E. Weerapana, C. Wang, G.M. Simon, F. Richter, S. Khare, M.B.D. Dillon, D.A. Bachovchin, K. Mowen, D. Baker, B.F. Cravatt, Quantitative reactivity profiling predicts functional cysteines in proteomes, *Nature*. 468 (2010) 790–795. <https://doi.org/10.1038/nature09472>.
- [3] M.M. Blewett, J. Xie, B.W. Zaro, K.M. Backus, A. Altman, J.R. Teijaro, B.F. Cravatt, Chemical proteomic map of dimethyl fumarate-sensitive cysteines in primary human T cells, *Sci Signal*. 9 (2016) rs10. <https://doi.org/10.1126/scisignal.aaf7694>.
- [4] J. Yang, K.A. Tallman, N.A. Porter, D.C. Liebler, Quantitative Chemoproteomics for Site-Specific Analysis of Protein Alkylation by 4-Hydroxy-2-Nonenal in Cells, *Anal. Chem.* 87 (2015) 2535–2541. <https://doi.org/10.1021/ac504685y>.
- [5] S.G. Codreanu, J.C. Ullery, J. Zhu, K.A. Tallman, W.N. Beavers, N.A. Porter, L.J. Marnett, B. Zhang, D.C. Liebler, Alkylation Damage by Lipid Electrophiles Targets Functional Protein Systems, *Mol Cell Proteomics*. 13 (2014) 849–859. <https://doi.org/10.1074/mcp.M113.032953>.
- [6] J.A. Clulow, E.M. Storck, T. Lanyon-Hogg, K.A. Kalesh, L.H. Jones, E.W. Tate, Competition-based, quantitative chemical proteomics in breast cancer cells identifies new target profiles for sulforaphane, *Chem Commun (Camb)*. 53 (2017) 5182–5185. <https://doi.org/10.1039/c6cc08797c>.
- [7] M. Abo, E. Weerapana, A Caged Electrophilic Probe for Global Analysis of Cysteine Reactivity in Living Cells, *J. Am. Chem. Soc.* 137 (2015) 7087–7090. <https://doi.org/10.1021/jacs.5b04350>.
- [8] J. Wang, J. Zhang, C.-J. Zhang, Y.K. Wong, T.K. Lim, Z.-C. Hua, B. Liu, S.R. Tannenbaum, H.-M. Shen, Q. Lin, In situ Proteomic Profiling of Curcumin Targets in HCT116 Colon Cancer Cell Line, *Sci Rep*. 6 (2016) 22146. <https://doi.org/10.1038/srep22146>.
- [9] D. Abegg, R. Frei, L. Cerato, D. Prasad Hari, C. Wang, J. Waser, A. Adibekian, Proteome-Wide Profiling of Targets of Cysteine reactive Small Molecules by Using Ethynyl Benziodoxolone Reagents, *Angewandte Chemie International Edition*. 54 (2015) 10852–10857. <https://doi.org/10.1002/anie.201505641>.
- [10] G.K. Jarugumilli, J.-R. Choi, P. Chan, M. Yu, Y. Sun, B. Chen, J. Niu, M. DeRan, B. Zheng, R. Zoeller, C. Lin, X. Wu, Chemical Probe to Identify the Cellular Targets of the Reactive Lipid Metabolite 2-trans-Hexadecenal, *ACS Chem. Biol.* 13 (2018) 1130–1136. <https://doi.org/10.1021/acscchembio.7b01063>.
- [11] M.M. Yore, A.N. Kettenbach, M.B. Sporn, S.A. Gerber, K.T. Liby, Proteomic Analysis Shows Synthetic Oleanane Triterpenoid Binds to mTOR, *PLOS ONE*. 6 (2011) e22862. <https://doi.org/10.1371/journal.pone.0022862>.
- [12] D. Davda, M.A. El Azzouny, C.T.M.B. Tom, J.L. Hernandez, J.D. Majmudar, R.T. Kennedy, B.R. Martin, Profiling Targets of the Irreversible Palmitoylation Inhibitor 2-Bromopalmitate, *ACS Chem. Biol.* 8 (2013) 1912–1917. <https://doi.org/10.1021/cb400380s>.
- [13] B. Zheng, M. DeRan, X. Li, X. Liao, M. Fukata, X. Wu, 2-Bromopalmitate Analogues as Activity-Based Probes To Explore Palmitoyl Acyltransferases, *J. Am. Chem. Soc.* 135 (2013) 7082–7085. <https://doi.org/10.1021/ja311416v>.

- [14] A. Kumari, S.P. Gholap, R.A. Fernandes, Tandem IBX-Promoted Primary Alcohol Oxidation/Opening of Intermediate  $\beta,\gamma$ -Diolcarbonate Aldehydes to (E)- $\gamma$ -Hydroxy- $\alpha,\beta$ -enals, *Chemistry – An Asian Journal*. 14 (2019) 2278–2290. <https://doi.org/10.1002/asia.201900421>.
- [15] M. Baalman, L. Neises, S. Bitsch, H. Schneider, L. Deweid, P. Werther, N. Ilkenhans, M. Wolfring, M.J. Ziegler, J. Wilhelm, H. Kolmar, R. Wombacher, A Bioorthogonal Click Chemistry Toolbox for Targeted Synthesis of Branched and Well-Defined Protein–Protein Conjugates, *Angewandte Chemie International Edition*. 59 (2020) 12885–12893. <https://doi.org/10.1002/anie.201915079>.
- [16] X. Cheng, L. Li, M. Uttamchandani, S.Q. Yao, In Situ Proteome Profiling of C75, a Covalent Bioactive Compound with Potential Anticancer Activities, *Org. Lett.* 16 (2014) 1414–1417. <https://doi.org/10.1021/ol500206w>.
